# Supplementary material for: Dexmedetomidine Attenuates Lipopolysaccharide-Induced Sympathetic Activation and Sepsis via Suppressing Superoxide Signaling in Paraventricular Nucleus
Source: MDPI journal article supplement (doi:10.3390/antiox11122395), 2022-12-02
Supplement: s1 [file s1]

**Table S1** Primers for RT-PCR analysis in rats

| Name                     | Primer  | Sequence                              | Accession no. |
|--------------------------|---------|---------------------------------------|---------------|
| Rat $\alpha$ 2A receptor | Forward | 5'- GCACCACTTGCCCCAGTAA -3'           | NM_012739     |
|                          | Reverse | 5'- AGCACACCCACCCGTTCTTCTT -3'        |               |
| Rat $\alpha$ 2B receptor | Forward | 5'- GATATAACCAGTTCCACCCCAGCTCAGAA -3' | NM_138505     |
|                          | Reverse | 5'- AGTTGGGAAGACAACCAGGAGGTAGA -3'    |               |
| Rat $\alpha$ 2C receptor | Forward | 5'- CGCGAGAAACGCTTCACCTT -3'          | NM_138506     |
|                          | Reverse | 5'- CACGGCAGATGCCATACAGG -3'          |               |
| Rat GAPDH                | Forward | 5'- TTCCAGGAGCGAGATCCCGCTAAC -3'      | NM_017008     |
|                          | Reverse | 5'- TTCAGGTGAGCCCCAGCCTTCT -3'        |               |
